# Supplementary figures and images for: Phosphorus Limitation of Trees Influences Forest Soil Fungal Diversity in China
Source: MDPI journal article supplement (doi:10.3390/f13020223), 2022-02-01

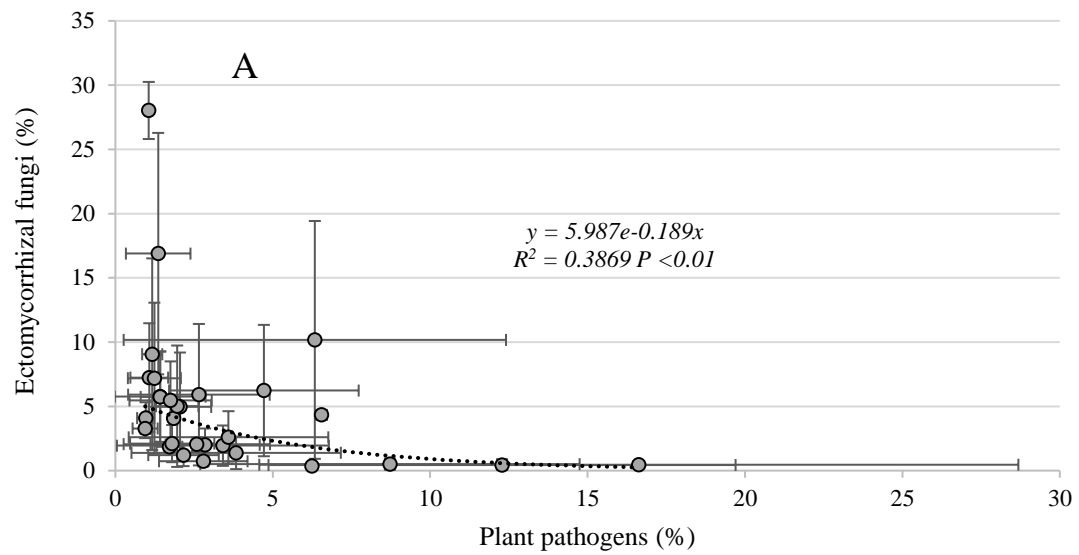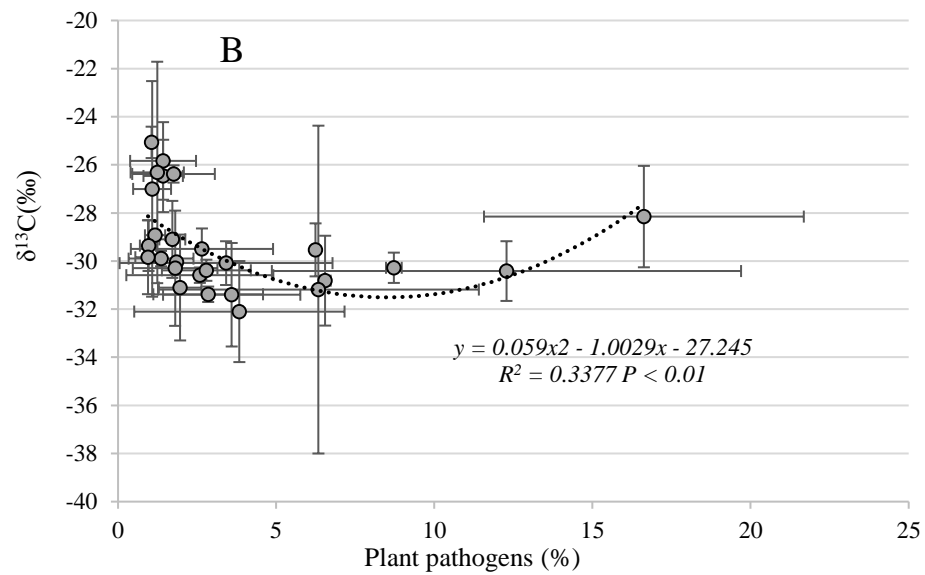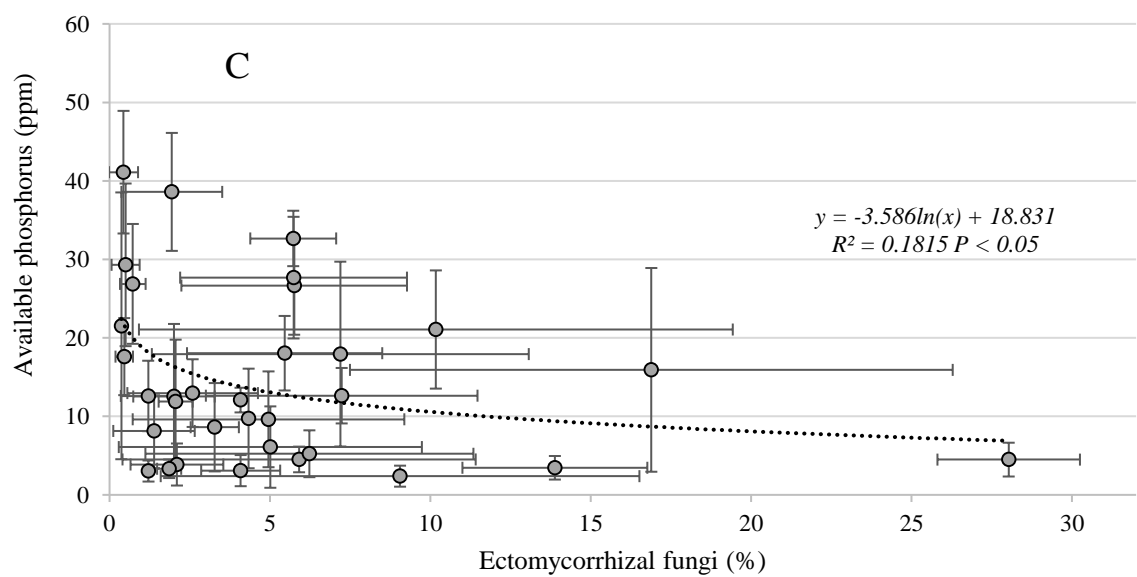

Supplement: s1 [file s1]
